# Supplementary material for: The Long-Term Health and Human Capital Consequences of Adverse Childhood Experiences in the Birth to Thirty Cohort: Single, Cumulative, and Clustered Adversity
Source: MDPI journal article supplement (doi:10.3390/ijerph19031799), 2022-02-05
Supplement: s1 [file s1]

## Supplementary Material

**Supplementary Table S1: Adverse childhood experiences questionnaire**

| Adverse childhood experiences: Thinking back to your childhood, the first 18 years of your life, please tick each one that applies to you |                                                                                                                                              |     |    |
|-------------------------------------------------------------------------------------------------------------------------------------------|----------------------------------------------------------------------------------------------------------------------------------------------|-----|----|
| ACE                                                                                                                                       | Question                                                                                                                                     | Yes | No |
| Physical abuse                                                                                                                            | Did a parent or other adult in the household <b>often or very often</b> ...<br>Push, grab, slap, or throw something at you?                  |     |    |
|                                                                                                                                           | <b>OR</b><br><b>Ever</b> hit you so hard that you had marks or were injured?                                                                 |     |    |
| Sexual abuse                                                                                                                              | Did an adult or person at least 5 years older than you <b>ever</b> ...<br>Touch or fondle you or have you touch their body in a sexual way?  |     |    |
|                                                                                                                                           | <b>OR</b><br>Attempt or actually have oral, anal, or vaginal intercourse with you?                                                           |     |    |
| Emotional abuse                                                                                                                           | Did a parent or other adult in the household <b>often or very often</b> ...<br>Swear at you, insult you, put you down, or humiliate you?     |     |    |
|                                                                                                                                           | <b>OR</b><br>Act in a way that made you afraid that you might be physically hurt?                                                            |     |    |
| Emotional neglect                                                                                                                         | Did you <b>often or very often</b> feel that ...<br>No one in your family loved you or thought you were important or special?                |     |    |
|                                                                                                                                           | <b>OR</b><br>Your family didn't look out for each other, feel close to each other, or support each other?                                    |     |    |
| Physical neglect                                                                                                                          | Did you <b>often or very often</b> feel that ...<br>You didn't have enough to eat, had to wear dirty clothes, and had no one to protect you? |     |    |
|                                                                                                                                           | <b>OR</b><br>Your parents were too drunk or high to take care of you or take you to the doctor if you needed it?                             |     |    |
| Parental divorce                                                                                                                          | Were your parents <b>ever</b> separated or divorced?                                                                                         |     |    |
| Witnessing domestic violence                                                                                                              | Was your mother or stepmother:<br><b>Often or very often</b> pushed, grabbed, slapped, or had something thrown at her?                       |     |    |

**Supplementary Table S1: Adverse childhood experiences questionnaire**

**Adverse childhood experiences: Thinking back to your childhood, the first 18 years of your life, please tick each one that applies to you**

|                                                                     |                                                                                                                      |
|---------------------------------------------------------------------|----------------------------------------------------------------------------------------------------------------------|
|                                                                     | <b>OR</b>                                                                                                            |
|                                                                     | <b>Sometimes, often, or very often</b> kicked, bitten, hit with a fist, or hit with something hard?                  |
|                                                                     | <b>OR</b>                                                                                                            |
|                                                                     | <b>Ever</b> repeatedly hit at least a few minutes or threatened with a gun or knife?                                 |
| <b>Alcohol and/or drug abuse in the household</b>                   | Did you live with anyone who was a problem drinker or alcoholic or who used street drugs?                            |
| <b>Mental illness in the household</b>                              | Was a household member depressed or mentally ill, or did a household member attempt suicide?                         |
| <b>Legal trouble in the household</b>                               | Did a household member go to prison?                                                                                 |
| <b>Chronic illness (other than mental illness) in the household</b> | Was there anyone in your household who was chronically ill when you were a child?                                    |
| <b>Unemployment of parent/caregiver</b>                             | Was one or more of your parents/caregivers mostly unemployed during your childhood because they could not get a job? |
| <b>Death of parent/caregiver</b>                                    | Did either of your parents/caregivers pass away before you turned 18?                                                |

**Supplementary Table S2: Model fit indices for latent class analysis of prospective and retrospective ACEs**

| <b>Number of classes</b> | <b>AIC</b> | <b>BIC</b> | <b>SSABIC</b> | <b>Entropy</b> | <b>Smallest class</b> |
|--------------------------|------------|------------|---------------|----------------|-----------------------|
| <b>Prospective LCA</b>   |            |            |               |                |                       |
| Class 1                  | 37452,01   | 37529,97   | 37488,66      |                |                       |
| Class 2                  | 35800,92   | 35962,84   | 35877,05      | 0,557          | 49,2                  |
| Class 3                  | 35565,64   | 35811,51   | 35681,24      | 0,495          | 31,6                  |
| Class 4                  | 35412,33   | 35742,17   | 35567,41      | 0,499          | 11,2                  |
| Class 5                  | 35372,72   | 35786,51   | 35567,27      | 0,464          | 10,2                  |
| Class 6                  | 35354,67   | 35852,42   | 35588,70      | 0,493          | 4,3                   |
| <b>Retrospective LCA</b> |            |            |               |                |                       |
| Class 1                  | 18434,05   | 18499,91   | 18461,79      |                |                       |
| Class 2                  | 16348,06   | 16485,28   | 16405,86      | 0,797          | 33,7                  |
| Class 3                  | 16156,52   | 16365,09   | 16244,37      | 0,688          | 13,0                  |
| Class 4                  | 16018,37   | 16298,30   | 16136,28      | 0,632          | 12,0                  |
| Class 5                  | 16013,32   | 16364,61   | 16161,29      | 0,663          | 1,8                   |
| Class 6                  | 16015,12   | 16437,76   | 16193,14      | 0,647          | 1,8                   |

**Supplementary Table S3: Crude associations between single, cumulative and clustered prospective ACEs and health and human capital outcomes**

|                              | Psychological distress | Social isolation | Incomplete schooling | Unemployed         | Substance use     | HIV infection     | Welfare receipt    | Criminality         |
|------------------------------|------------------------|------------------|----------------------|--------------------|-------------------|-------------------|--------------------|---------------------|
| <b>Single ACEs</b>           |                        |                  |                      |                    |                   |                   |                    |                     |
| Physical abuse               | 1.18 [.85-1.64]        | 1.20 [.80-1.79]  | 1.73 [1.28-2.33]***  | 1.38 [1.08-1.76]** | 1.03 [.76-1.40]   | 1.31 [.86-1.98]   | 1.28 [.92-1.78]    | .88 [.60-1.27]      |
| Sexual abuse                 | 1.01 [.72-1.40]        | .71 [.47-1.09]   | 1.74 [1.35-2.24]***  | 1.36 [1.05-1.77]*  | .84 [.62-1.14]    | 1.47 [1.03-2.10]* | 1.56 [1.16-2.10]** | 1.08 [.76-1.53]     |
| Emotional abuse              | 1.70 [1.23-2.35]**     | 1.16 [.79-1.71]  | 1.08 [.83-1.40]      | 1.04 [.80-1.33]    | 1.31 [.99-1.71]   | 1.25 [.87-1.81]   | .86 [.62-1.18]     | 1.38 [1.00-1.91]*   |
| Child separation             | .65 [.42-1.02]         | 1.10 [.62-1.94]  | .97 [.68-1.37]       | 1.06 [.76-1.48]    | 1.25 [.88-1.79]   | 1.14 [.69-1.87]   | 1.25 [.84-1.85]    | 1.09 [.68-1.74]     |
| Parental divorce             | .86 [.63-1.17]         | .91 [.62-1.35]   | 1.15 [.88-1.51]      | 1.21 [.94-1.55]    | .98 [.73-1.30]    | 1.08 [.76-1.52]   | 1.43 [1.04-1.97]*  | .73 [.53-1.01]      |
| Parental death               | 1.02 [.67-1.55]        | .94 [.47-1.54]   | 1.25 [.94-1.66]      | .89 [.66-1.20]     | .94 [.66-1.34]    | 1.29 [.88-1.89]   | .87 [.60-1.27]     | 1.26 [.86-1.87]     |
| Exposure to violence         | 1.47 [.99-2.18]        | .99 [.59-1.67]   | .90 [.65-1.24]       | .98 [.73-1.33]     | 1.47 [1.00-2.17]* | .80 [.51-1.27]    | .81 [.58-1.13]     | 1.64 [1.04-2.58]*   |
| Exposure to IPV              | 1.05 [.74-1.50]        | 1.23 [.81-1.86]  | 1.19 [.89-1.58]      | .95 [.72-1.33]     | 1.52 [1.10-2.10]* | 1.19 [.79-1.78]   | .77 [.54-1.10]     | 2.48 [1.70-3.61]*** |
| Household substance abuse    | 1.29 [.93-1.79]        | 1.19 [.81-1.86]  | 1.04 [.81-1.33]      | 1.07 [.84-1.35]    | .81 [.59-1.10]    | .88 [.61-1.25]    | 1.10 [.81-1.49]    | .77 [.54-1.09]      |
| Chronic unemployment         | .85 [.54-1.34]         | 1.38 [.72-2.67]  | 1.29 [.83-1.99]      | 1.22 [.85-1.76]    | .77 [.50-1.19]    | .73 [.41-1.29]    | 1.79 [1.06-3.01]*  | .70 [.43-1.13]      |
| Household legal trouble      | 1.22 [.87-1.71]        | 1.53 [.99-2.36]  | 1.27 [.95-1.68]      | 1.01 [.79-1.29]    | 1.23 [.89-1.70]   | .95 [.64-1.43]    | .71 [.49-1.02]     | 1.56 [1.08-2.26]*   |
| Household illness/disability | 1.06 [.76-1.48]        | .75 [.50-1.14]   | 1.20 [.91-1.58]      | 1.01 [.77-1.32]    | .86 [.63-1.17]    | 1.13 [.77-1.65]   | 1.26 [.88-1.82]    | 1.13 [.79-1.63]     |
| Household death              | 1.15 [.83-1.60]        | .87 [.59-1.27]   | .79 [.60-1.04]       | 1.43 [1.09-1.88]** | 1.32 [.95-1.83]   | 1.10 [.76-1.58]   | .90 [.62-1.32]     | 1.14 [.82-1.58]     |
| <b>Cumulative ACEs</b>       |                        |                  |                      |                    |                   |                   |                    |                     |
| Less than 6                  | Ref                    | Ref              | Ref                  | Ref                | Ref               | Ref               | Ref                | Ref                 |
| 6 or more                    | 1.61 [1.20-2.16]**     | 1.19 [.83-1.72]  | 1.67 [1.31-2.12]***  | 1.40 [1.10-1.77]** | 1.39 [1.03-1.89]* | 1.36 [.97-1.89]   | 1.12 [.86-1.45]    | 1.79 [1.32-2.42]*** |
| 0                            | Ref                    | Ref              | Ref                  | Ref                | Ref               | Ref               | Ref                | Ref                 |
| 1                            | .46 [.10-2.13]         | N/A              | 1.61 [.15-16.87]     | 1.28 [.20-8.20]    | 1.41 [.13-15.75]  | N/A               | 1.29 [.11-15.61]   | .48 [.03-8.26]      |
| 2                            | .74 [.27-1.90]         | .23 [.01-4.20]   | 2.11 [.22-19.75]     | 1.74 [.30-9.99]    | 2.26 [.24-21.44]  | .79 [.12-4.69]    | 1.57 [.15-16.09]   | 1.12 [.11-11.25]    |
| 3                            | .42 [.19-.91]*         | .93 [.10-8.40]   | 2.12 [.25-18.34]     | 1.98 [.38-10.34]   | 1.57 [.18-14.05]  | .40 [.07-2.31]    | 1.71 [.19-15.75]   | .88 [.10-7.81]      |
| 4+                           | N/A                    | .83 [.10-6.83]   | 3.52 [.43-28.72]     | 2.35 [.47-11.67]   | 2.39 [.28-20.05]  | .51 [.10-2.53]    | 2.09 [.24-17.83]   | 1.43 [.17-11.71]    |
| <b>Clustered ACEs</b>        |                        |                  |                      |                    |                   |                   |                    |                     |
| Class 1                      | Ref                    | Ref              | Ref                  | Ref                | Ref               | Ref               | Ref                | Ref                 |
| Class 2                      | 1.41 [.68-2.94]        | 1.15 [.50-2.65]  | 1.83 [1.03-3.24]*    | 1.45 [.88-2.38]    | .94 [.56-1.58]    | 1.05 [.49-2.25]   | 1.65 [.90-3.02]    | 1.16 [.52-2.57]     |
| Class 3                      | 1.94 [.88-4.24]        | 1.64 [.68-4.01]  | 1.83 [1.02-3.27]*    | 1.29 [.76-2.19]    | 1.60 [.89-2.86]   | 1.27 [.56-2.84]   | 1.11 [.55-2.23]    | 2.59 [1.19-5.65]*   |
| Class 4                      | 2.23 [1.13-4.38]*      | 1.55 [.69-3.45]  | 2.97 [1.70-5.18]***  | 1.90 [1.16-3.13]*  | 1.66 [.95-2.92]   | 1.37 [.66-2.86]   | 1.61 [.84-3.07]    | 2.77 [1.29-5.95]**  |

\* $p < .05$  \*\* $p < .01$  \*\*\* $p < .001$

N/A = omitted due to within cell sizes

The table shows the fold-increase in the odds (OR, odds ratio) of each adult human capital outcome (columns) for each level of ACEs measurement (rows). Models were run separately for each of the 3 ACE measurements

**Supplementary Table S4: Crude associations between single, cumulative and clustered retrospective ACEs and health and human capital outcomes**

|                              | Psychological distress | Social isolation   | Incomplete schooling | Unemployed          | Substance use       | HIV infection     | Welfare receipt   | Criminality        |
|------------------------------|------------------------|--------------------|----------------------|---------------------|---------------------|-------------------|-------------------|--------------------|
| <b>Single ACEs</b>           |                        |                    |                      |                     |                     |                   |                   |                    |
| Physical abuse               | 1.06 [.63-1.80]        | 2.12 [1.06-4.22]*  | 1.10 [.64-1.88]      | .98 [.62-1.57]      | 1.93 [1.11-3.35]*   | .97 [.50-1.88]    | .60 [.31-1.15]    | 1.58 [.87-2.86]    |
| Sexual abuse                 | 2.30 [1.21-4.39]*      | 1.58 [.68-3.69]    | 1.05 [.51-2.17]      | .89 [.45-1.78]      | 1.25 [.60-2.60]     | 2.84 [1.04-7.75]* | 1.50 [.65-3.47]   | 1.33 [.61-2.89]    |
| Emotional abuse              | 1.90 [1.35-2.68]***    | .83 [.68-3.69]     | 1.57 [1.19-2.08]**   | 1.09 [.84-1.41]     | 1.00 [.70-1.43]     | 1.32 [.82-2.11]   | 1.09 [.80-1.50]   | 1.32 [.95-1.84]    |
| Parental divorce             | .79 [.58-1.08]         | .63 [.41-.96]*     | .83 [.64-1.06]       | 1.06 [.78-1.45]     | .92 [.66-1.30]      | .87 [.52-1.47]    | 1.17 [.80-1.71]   | .91 [.62-1.32]     |
| Parental death               | 1.09 [.75-1.57]        | 1.37 [.85-2.22]    | 1.28 [.95-1.74]      | .96 [.70-1.30]      | .81 [.56-1.18]      | 1.11 [.76-1.61]   | .78 [.53-1.15]    | 1.39 [.96-1.99]    |
| Exposure to violence         | .93 [.64-1.34]         | 1.41 [.90-2.21]    | .99 [.75-1.32]       | .96 [.72-1.27]      | 1.97 [1.47-2.64]*** | .90 [.57-1.42]    | .75 [.54-1.02]    | 1.71 [1.15-2.52]** |
| Exposure to IPV              | .99 [.62-1.56]         | .54 [.27-1.08]     | .83 [.56-1.21]       | .65 [.44-.97]*      | 1.02 [.64-1.64]     | .69 [.38-1.24]    | .88 [.56-1.38]    | 1.14 [.71-1.81]    |
| Household substance abuse    | 1.30 [.92-1.83]        | 1.81 [1.18-2.76]** | 1.22 [.87-1.72]      | 1.73 [1.33-2.25]*** | 1.14 [.81-1.59]     | 1.63 [1.12-2.38]* | .91 [.62-1.34]    | 1.15 [.80-1.65]    |
| Chronic unemployment         | 1.10 [.79-1.53]        | 1.36 [.91-2.05]    | 1.21 [.91-1.59]      | 1.31 [1.03-1.66]*   | .98 [.74-1.29]      | .81 [.54-1.20]    | 1.31 [.99-1.74]   | 1.29 [.94-1.76]    |
| Household legal trouble      | .91 [.62-1.33]         | .73 [.44-1.20]     | 1.00 [.74-1.36]      | .96 [.68-1.35]      | 1.20 [.81-1.78]     | 1.22 [.80-1.86]   | .90 [.61-1.34]    | 1.13 [.79-1.63]    |
| Household illness/disability | 1.75 [1.23-2.48]**     | .79 [.51-1.22]     | .91 [.68-1.21]       | .76 [.58-.98]*      | .72 [.54-.96]       | .73 [.49-1.09]    | 1.08 [.77-1.51]   | .85 [.54-1.34]     |
| Household death              | .95 [.67-1.33]         | 1.04 [.70-1.56]    | .89 [.67-1.18]       | 1.16 [.87-1.53]     | 1.00 [.74-1.36]     | .79 [.50-1.25]    | .97 [.60-1.55]    | .75 [.50-1.12]     |
| <b>Cumulative ACEs</b>       |                        |                    |                      |                     |                     |                   |                   |                    |
| Less than 6                  | Ref                    | Ref                | Ref                  | Ref                 | Ref                 | Ref               | Ref               | Ref                |
| 6 or more                    | 1.57 [1.11-2.32]*      | .98 [.53-1.80]     | 1.55 [1.09-2.19]*    | 1.33 [.95-1.86]     | 1.29 [.88-1.88]     | .94 [.54-1.63]    | .80 [.46-1.40]    | 1.91 [1.28-2.83]** |
| 0                            | Ref                    | Ref                | Ref                  | Ref                 | Ref                 | Ref               | Ref               | Ref                |
| 1                            | 1.89 [.83-4.33]        | 1.07 [.49-2.32]    | .99 [.61-1.62]       | 1.43 [.87-2.34]     | .97 [.57-1.65]      | 1.09 [.51-2.33]   | 1.16 [.64-2.09]   | 1.50 [.70-3.19]    |
| 2                            | 1.87 [.83-4.19]        | 1.01 [.46-2.25]    | 1.38 [.85-2.24]      | 1.23 [.77-1.98]     | .98 [.57-1.68]      | 1.30 [.64-2.62]   | 1.58 [.88-2.85]   | 1.38 [.62-3.05]    |
| 3                            | 2.81 [1.25-6.35]*      | 1.56 [.73-3.30]    | 1.28 [.80-2.08]      | 1.21 [.75-1.97]     | 1.54 [.90-2.61]     | .97 [.45-2.12]    | 1.30 [.72-2.33]   | 2.55 [1.19-5.46]*  |
| 4+                           | 3.75 [1.74-8.08]**     | 1.26 [.63-2.54]    | 1.47 [.94-2.31]      | 1.46 [.92-2.30]     | 1.36 [.86-2.17]     | 1.25 [.63-2.50]   | 1.18 [.62-2.25]   | 2.50 [1.20-5.14]*  |
| <b>Clustered ACEs</b>        |                        |                    |                      |                     |                     |                   |                   |                    |
| Class 1                      | Ref                    | Ref                | Ref                  | Ref                 | Ref                 | Ref               | Ref               | Ref                |
| Class 2                      | 1.48 [.99-2.21]        | 1.26 [.80-2.00]    | 1.26 [.93-1.71]      | 1.30 [.99-1.72]     | 1.05 [.76-1.45]     | .75 [.47-1.17]    | 1.47 [1.06-2.05]* | 1.45 [.99-2.17]    |
| Class 3                      | 2.58 [1.67-3.99]***    | 1.04 [.59-1.83]    | 1.18 [.83-1.68]      | .91 [.64-1.28]      | 1.24 [.84-1.82]     | 1.12 [.69-1.81]   | 1.05 [.66-1.68]   | 1.61 [1.03-2.53]*  |
| Class 4                      | 2.56 [1.64-4.00]***    | 1.25 [.71-2.20]    | 1.56 [1.09-2.24]*    | 1.28 [.89-1.83]     | 1.18 [.79-1.73]     | 1.14 [.71-1.84]   | 1.06 [.64-1.73]   | 2.10 [1.35-3.27]** |

\* $p < .05$  \*\* $p < .01$  \*\*\* $p < .001$

N/A = omitted due to within cell sizes

The table shows the fold-increase in the odds (OR, odds ratio) of each adult human capital outcome (columns) for each level of ACEs measurement (rows). Models were run separately for each of the 3 ACE measurements

**Supplementary Table S5: Adjusted associations between single, cumulative and clustered prospective ACEs and health and human capital outcomes**

|                              | Psychological distress | Social isolation | Incomplete schooling | Unemployed         | Substance use     | HIV infection   | Welfare receipt   | Criminality         |
|------------------------------|------------------------|------------------|----------------------|--------------------|-------------------|-----------------|-------------------|---------------------|
| <b>Single ACEs</b>           |                        |                  |                      |                    |                   |                 |                   |                     |
| Physical abuse               | 1.20 [.85-1.69]        | 1.12 [.75-1.68]  | 1.69 [1.21-2.35]**   | 1.31 [1.02-1.69]*  | 1.04 [.74-1.47]   | 1.30 [.85-1.99] | 1.33 [.90-1.99]   | .86 [.528-1.29]     |
| Sexual abuse                 | .95 [.65-1.37]         | .64 [.42-.99]*   | 1.58 [1.21-2.08]**   | 1.20 [.92-1.57]    | .87 [.62-1.22]    | 1.31 [.90-1.91] | 1.53 [1.07-2.20]* | 1.11 [.77-1.61]     |
| Emotional abuse              | 1.74 [1.24-2.44]**     | 1.19 [.80-1.76]  | 1.09 [.81-1.45]      | 1.06 [.81-1.38]    | 1.37 [1.02-1.84]* | 1.28 [.86-1.90] | .85 [.58-1.25]    | 1.36 [.95-1.93]     |
| Child separation             | .57 [.36-.91]*         | 1.17 [.65-2.09]  | 1.03 [.70-1.51]      | 1.05 [.74-1.49]    | 1.35 [.92-1.97]   | 1.08 [.64-1.82] | 1.09 [.69-1.72]   | 1.21 [.72-2.01]     |
| Parental divorce             | .81 [.58-1.13]         | .96 [.64-1.45]   | 1.22 [.90-1.65]      | 1.19 [.91-1.56]    | 1.06 [.78-1.44]   | 1.04 [.72-1.51] | 1.31 [.89-1.92]   | .78 [.55-1.12]      |
| Parental death               | 1.02 [.66-1.58]        | .91 [.54-1.52]   | 1.10 [.81-1.49]      | .81 [.59-1.11]     | .95 [.64-1.40]    | 1.26 [.82-1.93] | .87 [.57-1.32]    | 1.25 [.83-1.90]     |
| Exposure to violence         | 1.64 [1.08-2.49]*      | .95 [.56-1.62]   | .87 [.61-1.25]       | 1.00 [.73-1.37]    | 1.33 [.88-2.00]   | .84 [.52-1.34]  | .96 [.65-1.41]    | 1.45 [.88-2.39]     |
| Exposure to IPV              | 1.18 [.83-1.69]        | 1.11 [.73-1.69]  | 1.03 [.76-1.40]      | .86 [.64-1.16]     | 1.39 [.95-2.02]   | 1.20 [.78-1.84] | .85 [.54-1.34]    | 2.27 [1.49-3.45]*** |
| Household substance abuse    | 1.23 [.88-1.73]        | 1.20 [.81-1.79]  | .99 [.76-1.30]       | 1.04 [.81-1.34]    | .84 [.60-1.17]    | .83 [.56-1.22]  | 1.01 [.70-1.46]   | .84 [.59-1.21]      |
| Chronic unemployment         | .82 [.50-1.32]         | 1.34 [.67-2.68]  | 1.23 [.76-1.98]      | 1.10 [.75-1.63]    | .83 [.52-1.34]    | .69 [.38-1.27]  | 1.71 [.97-3.04]   | .71 [.42-1.20]      |
| Household legal trouble      | 1.34 [.95-1.88]        | 1.46 [.93-2.30]  | 1.17 [.87-1.59]      | .95 [.74-1.23]     | 1.06 [.75-1.51]   | 1.00 [.66-1.54] | .81 [.51-1.29]    | 1.36 [.93-2.00]     |
| Household illness/disability | 1.04 [.74-1.47]        | .71 [.47-1.06]   | 1.27 [.95-1.72]      | 1.07 [.81-1.42]    | .84 [.61-1.16]    | 1.18 [.78-1.78] | 1.33 [.83-2.14]   | 1.21 [.83-1.78]     |
| Household death              | 1.12 [.80-1.58]        | .88 [.59-1.30]   | .80 [.59-1.07]       | 1.57 [1.17-2.11]** | 1.35 [.95-1.90]   | 1.13 [.77-1.66] | .89 [.56-1.41]    | 1.15 [.82-1.61]     |
| <b>Cumulative ACEs</b>       |                        |                  |                      |                    |                   |                 |                   |                     |
| Less than 6                  | Ref                    | Ref              | Ref                  | Ref                | Ref               | Ref             | Ref               | Ref                 |
| 6 or more                    | 1.63 [1.19-2.23]**     | 1.08 [.75-1.57]  | 1.51 [1.15-1.99]**   | 1.28 [1.10-1.64]*  | 1.39 [.98-1.99]   | 1.36 [.95-1.95] | 1.18 [.87-1.61]   | 1.80 [1.28-2.54]**  |
| 0                            | Ref                    | Ref              | Ref                  | Ref                | Ref               | Ref             | Ref               | Ref                 |
| 1                            | .47 [.09-2.43]         | N/A              | 1.29 [.11-15.03]     | 1.11 [.16-7.59]    | 1.46 [.11-19.53]  | N/A             | 1.49 [.09-23.76]  | .34 [.02-6.37]      |
| 2                            | .68 [.25-1.84]         | N/A              | 1.49 [.15-15.03]     | 1.28 [.21-7.64]    | 3.16 [.29-34.36]  | N/A             | 1.25 [.10-16.01]  | 1.31 [.11-15.13]    |
| 3                            | .40 [.18-.88]*         | 1.42 [.55-3.67]  | 1.38 [.15-12.88]     | 1.48 [.27-8.21]    | 1.87 [.18-18.97]  | .71 [.22-2.25]  | 1.67 [.14-19.55]  | .74 [.07-7.38]      |
| 4+                           | N/A                    | N/A              | 2.31 [.26-20.57]     | 1.72 [.33-8.98]    | 2.71 [.29-25.48]  | N/A             | 2.19 [.21-23.13]  | 1.22 [.14-10.88]    |
| <b>Clustered ACEs</b>        |                        |                  |                      |                    |                   |                 |                   |                     |
| Class 1                      | Ref                    | Ref              | Ref                  | Ref                | Ref               | Ref             | Ref               | Ref                 |
| Class 2                      | 1.40 [.65-3.00]        | 1.08 [.46-2.55]  | 1.77 [.97-3.20]      | 1.33 [.79-2.24]    | .98 [.56-1.72]    | 1.01 [.46-2.19] | 1.67 [.87-3.18]   | 1.21 [.52-2.84]     |
| Class 3                      | 2.23 [1.10-5.04]*      | 1.41 [.55-3.52]  | 1.51 [.81-2.81]      | 1.08 [.62-1.86]    | 1.46 [.78-2.73]   | 1.24 [.54-2.89] | 1.36 [.63-2.91]   | 2.29 [1.01-5.22]*   |
| Class 4                      | 2.47 [1.19-5.09]*      | 1.25 [.55-2.86]  | 2.39 [1.33-4.31]**   | 1.56 [.93-2.67]    | 1.58 [.84-2.98]   | 1.33 [.62-2.86] | 1.96 [.97-3.93]   | 2.60 [1.12-6.02]*   |

\* $p < .05$     \*\* $p < .01$     \*\*\* $p < .001$

N/A = omitted due to within cell sizes

The table shows the fold-increase in the odds (OR, odds ratio) of each adult human capital outcome (columns) for each level of ACEs measurement (rows). Models were run separately for each of the 3 ACE measurements and fully adjusted for all covariates, including sex, SES at birth, SES at age 12, SES at age 22, maternal age at birth and maternal and paternal schooling.

**Supplementary Table S6: Adjusted associations between single, cumulative and clustered retrospective ACEs and health and human capital outcomes**

|                              | Psychological distress | Social isolation  | Incomplete schooling | Unemployed         | Substance use       | HIV infection     | Welfare receipt | Criminality        |
|------------------------------|------------------------|-------------------|----------------------|--------------------|---------------------|-------------------|-----------------|--------------------|
| <b>Single ACEs</b>           |                        |                   |                      |                    |                     |                   |                 |                    |
| Physical abuse               | 1.32 [.76-2.28]        | 1.92 [.93-3.98]   | 1.16 [.66-2.04]      | 1.02 [.63-1.64]    | 1.62 [.89-2.96]     | 1.03 [.51-2.08]   | .79 [.38-1.67]  | 1.37 [.72-2.59]    |
| Sexual abuse                 | 2.05 [1.02-4.12]*      | 1.83 [.75-4.50]   | 1.15 [.53-2.48]      | .80 [.39-1.66]     | 1.50 [.66-3.40]     | 3.03 [1.03-7.91]* | 1.09 [.43-2.72] | 1.90 [.80-4.50]    |
| Emotional abuse              | 1.96 [1.37-2.82]***    | .82 [.53-1.27]    | 1.48 [1.09-2.01]*    | 1.04 [.79-1.36]    | 1.02 [.71-1.48]     | 1.30 [.80-2.11]   | 1.10 [.77-1.57] | 1.35 [.94-1.92]    |
| Parental divorce             | .82 [.59-1.13]         | .64 [.41-.99]*    | .81 [.61-1.07]       | 1.04 [.75-1.46]    | .96 [.66-1.40]      | .85 [.47-1.51]    | 1.12 [.71-1.78] | .95 [.63-1.43]     |
| Parental death               | 1.17 [.80-1.72]        | 1.39 [.85-2.26]   | 1.17 [.84-1.62]      | .89 [.64-1.22]     | .79 [.53-1.17]      | 1.09 [.73-1.64]   | .79 [.50-1.22]  | 1.30 [.88-1.92]    |
| Exposure to violence         | 1.05 [.71-1.55]        | 1.27 [.80-2.01]   | .97 [.72-1.30]       | .95 [.71-1.26]     | 1.73 [1.28-2.35]*** | .97 [.60-1.55]    | .92 [.64-1.33]  | 1.47 [.97-2.22]    |
| Exposure to IPV              | .95 [.60-1.53]         | .57 [.28-1.13]    | .92 [.61-1.37]       | .69 [.45-1.04]     | 1.05 [.64-1.72]     | .72 [.39-1.32]    | .81 [.49-1.34]  | 1.32 [.80-2.18]    |
| Household substance abuse    | 1.39 [.96-2.02]        | 1.61 [1.04-2.50]* | 1.03 [.72-1.48]      | 1.56 [1.19-2.06]** | 1.16 [.81-1.65]     | 1.50 [1.00-2.24]* | .92 [.59-1.43]  | 1.07 [.74-1.57]    |
| Chronic unemployment         | 1.14 [.81-1.61]        | 1.26 [.81-1.97]   | .92 [.67-1.25]       | 1.10 [.85-1.42]    | .99 [.73-1.34]      | .68 [.42-1.09]    | 1.27 [.92-1.76] | 1.29 [.90-1.87]    |
| Household legal trouble      | .88 [.60-1.31]         | .71 [.42-1.21]    | .94 [.68-1.29]       | .92 [.65-1.31]     | 1.12 [.75-1.69]     | 1.19 [.75-1.87]   | .98 [.62-1.53]  | 1.06 [.73-1.55]    |
| Household illness/disability | 1.71 [1.16-2.48]**     | .86 [.55-1.36]    | .93 [.68-1.27]       | .76 [.58-.99]*     | .77 [.57-1.06]      | .70 [.45-1.09]    | .99 [.67-1.46]  | .87 [.52-1.44]     |
| Household death              | .91 [.64-1.30]         | 1.04 [.565-1.36]  | .87 [.63-1.19]       | 1.20 [.90-1.60]    | .97 [.70-1.34]      | .79 [.49-1.26]    | .95 [.55-1.65]  | .71 [.46-1.08]     |
| <b>Cumulative ACEs</b>       |                        |                   |                      |                    |                     |                   |                 |                    |
| Less than 6                  | Ref                    | Ref               | Ref                  | Ref                | Ref                 | Ref               | Ref             | Ref                |
| 6 or more                    | 1.72 [1.13-2.61]*      | .88 [.46-1.69]    | 1.21 [.83-1.76]      | 1.12 [.78-1.59]    | 1.22 [.82-1.82]     | .84 [.47-1.49]    | .83 [.44-1.57]  | 1.69 [1.09-2.63]*  |
| 0                            | Ref                    | Ref               | Ref                  | Ref                | Ref                 | Ref               | Ref             | Ref                |
| 1                            | 1.88 [.82-4.30]        | 1.06 [.47-2.39]   | .76 [.45-1.28]       | 1.29 [.76-2.00]    | .92 [.53-1.59]      | .97 [.44-2.13]    | 1.14 [.58-2.22] | 1.55 [.69-3.48]    |
| 2                            | 1.71 [.76-3.84]        | 1.08 [.47-2.49]   | 1.14 [.68-1.91]      | 1.07 [.65-1.77]    | 1.07 [.61-1.88]     | 1.12 [.54-2.30]   | 1.35 [.70-2.60] | 1.60 [.69-3.70]    |
| 3                            | 2.87 [1.26-6.54]**     | 1.49 [.67-3.29]   | .93 [.56-1.55]       | 1.01 [.60-1.68]    | 1.48 [.84-2.61]     | .79 [.35-1.80]    | 1.27 [.65-2.51] | 2.54 [1.13-5.72]*  |
| 4+                           | 4.08 [1.88-6.85]***    | 1.15 [.54-2.44]   | .93 [.57-1.51]       | 1.09 [.67-1.78]    | 1.31 [.80-2.16]     | 1.02 [.49-2.10]   | 1.17 [.55-2.46] | 2.43 [1.08-5.46]*  |
| <b>Clustered ACEs</b>        |                        |                   |                      |                    |                     |                   |                 |                    |
| Class 1                      | Ref                    | Ref               | Ref                  | Ref                | Ref                 | Ref               | Ref             | Ref                |
| Class 2                      | 1.52 [1.01-2.29]*      | 1.18 [.73-1.92]   | .95 [.68-1.32]       | 1.05 [.78-1.40]    | 1.08 [.76-1.53]     | .62 [.37-1.03]    | 1.41 [.98-2.05] | 1.51 [.97-2.37]    |
| Class 3                      | 2.82 [1.8 -4.41]***    | 1.01 [.57-1.81]   | 1.05 [.72-1.52]      | .80 [.57-1.14]     | 1.27 [.84-1.93]     | 1.07 [.65-1.77]   | 1.01 [.60-1.70] | 1.69 [1.04-2.73]*  |
| Class 4                      | 2.97 [1.86-4.74]***    | 1.09 [.58-2.04]   | .98 [.66-1.46]       | .94 [.63-1.39]     | 1.15 [.74-1.78]     | .88 [.50-1.53]    | 1.08 [.61-1.92] | 2.01 [1.18-3.29]** |

\* $p < .05$  \*\* $p < .01$  \*\*\* $p < .001$

N/A = omitted due to within cell sizes

The table shows the fold-increase in the odds (OR, odds ratio) of each adult human capital outcome (columns) for each level of ACEs measurement (rows). Models were run separately for each of the 3 ACE measurements and fully adjusted for all covariates, including sex, SES at birth, SES at age 12, SES at age 22, maternal age at birth and maternal and paternal schooling.

**Supplementary Table S7: Adjusted associations between single, cumulative and clustered prospective ACEs and health and human capital outcomes, by sex**

|                              | Psychological distress |                     | Social isolation    |                     | Incomplete schooling  |                        | Unemployed           |                     | Substance use        |                     | HIV infection       |                     | Welfare receipt     |                      | Criminality           |                      |
|------------------------------|------------------------|---------------------|---------------------|---------------------|-----------------------|------------------------|----------------------|---------------------|----------------------|---------------------|---------------------|---------------------|---------------------|----------------------|-----------------------|----------------------|
|                              | Male                   | Female              | Male                | Female              | Male                  | Female                 | Male                 | Female              | Male                 | Female              | Male                | Female              | Male                | Female               | Male                  | Female               |
| <b>Single ACEs</b>           |                        |                     |                     |                     |                       |                        |                      |                     |                      |                     |                     |                     |                     |                      |                       |                      |
| Physical abuse               | 1.16<br>[0.64-2.12]    | 1.29<br>[0.86-1.95] | 0.8<br>[0.48-1.35]  | 1.8<br>[0.88-3.66]  | 1.46<br>[0.96-2.21]   | 2.08***<br>[1.25-3.45] | 1.28<br>[0.87-1.89]  | 1.37<br>[0.95-1.97] | 1.03<br>[0.66-1.6]   | 1.05<br>[0.6-1.83]  | 1.47<br>[0.77-2.82] | 1.22<br>[0.71-2.09] | 1.3<br>[0.6-2.82]   | 1.36<br>[0.92-2.02]  | 0.89<br>[0.57-1.38]   | 0.79<br>[0.35-1.78]  |
| Sexual abuse                 | 0.93<br>[0.47-1.82]    | 0.96<br>[0.62-1.48] | 0.75<br>[0.44-1.29] | 0.53<br>[0.25-1.09] | 1.68***<br>[1.17-2.4] | 1.52*<br>[1.01-2.31]   | 1.41<br>[0.95-2.09]  | 1.08<br>[0.72-1.6]  | 0.75<br>[0.51-1.1]   | 1.07<br>[0.59-1.93] | 1.49<br>[0.76-2.95] | 1.2<br>[0.72-2.00]  | 1.51<br>[0.74-3.11] | 1.56*<br>[1.06-2.3]  | 0.97<br>[0.62-1.5]    | 1.86<br>[0.91-3.79]  |
| Emotional abuse              | 2.54**<br>[1.42-4.53]  | 1.44<br>[0.93-2.22] | 1.03<br>[0.59-1.81] | 1.47<br>[0.7-3.09]  | 1.12<br>[0.75-1.66]   | 1.05<br>[0.65-1.71]    | 1.04<br>[0.7-1.55]   | 1.06<br>[0.74-1.52] | 1.52*<br>[1.03-2.25] | 1.20<br>[0.71-2.05] | 1.70<br>[0.96-2.99] | 1.08<br>[0.65-1.8]  | 0.66<br>[0.28-1.56] | 0.94<br>[0.63-1.41]  | 1.57*<br>[1.04-2.38]  | 0.94<br>[0.39-2.22]  |
| Child separation             | 0.51<br>[0.21-1.24]    | 0.6<br>[0.34-1.06]  | 1.46<br>[0.68-3.15] | 0.81<br>[0.29-2.29] | 0.88<br>[0.49-1.6]    | 1.2<br>[0.69-2.06]     | 1.06<br>[0.6-1.86]   | 1.04<br>[0.64-1.69] | 1.13<br>[0.64-1.97]  | 1.6<br>[0.93-2.74]  | 0.72<br>[0.27-1.93] | 1.25<br>[0.68-2.31] | 1.26<br>[0.48-3.28] | 1.02<br>[0.63-1.66]  | 1.29<br>[0.74-2.24]   | 1.21<br>[0.45-3.24]  |
| Parental divorce             | 0.72<br>[0.36-1.41]    | 0.82<br>[0.53-1.24] | 0.83<br>[0.48-1.42] | 1.03<br>[0.54-1.95] | 1.28<br>[0.82-2.02]   | 1.13<br>[0.75-1.71]    | 1.15<br>[0.79-1.68]  | 1.23<br>[0.85-1.78] | 0.93<br>[0.65-1.35]  | 1.30<br>[0.75-2.23] | 0.79<br>[0.41-1.54] | 1.28<br>[0.81-2.03] | 1.44<br>[0.7-2.93]  | 1.29<br>[0.84-1.97]  | 0.74<br>[0.48-1.12]   | 1.03<br>[0.46-2.32]  |
| Parental death               | 0.86<br>[0.39-1.89]    | 1.14<br>[0.69-1.88] | 0.73<br>[0.36-1.5]  | 1.43<br>[0.66-3.07] | 0.85<br>[0.55-1.31]   | 1.63<br>[0.97-2.72]    | 0.82<br>[0.52-1.28]  | 0.79<br>[0.51-1.22] | 0.92<br>[0.57-1.47]  | 1.01<br>[0.53-1.95] | 1.4<br>[0.75-2.65]  | 1.09<br>[0.57-2.09] | 0.71<br>[0.24-2.14] | 0.96<br>[0.62-1.5]   | 1.06<br>[0.64-1.76]   | 1.92<br>[0.77-4.79]  |
| Exposure to violence         | 3.05*<br>[1.01-9.18]   | 1.52<br>[0.97-2.39] | 1.34<br>[0.62-2.89] | 0.68<br>[0.33-1.41] | 0.94<br>[0.54-1.64]   | 0.81<br>[0.52-1.27]    | 1.03<br>[0.58-1.81]  | 1.01<br>[0.69-1.49] | 1.57<br>[0.9-2.77]   | 1.04<br>[0.62-1.77] | 0.88<br>[0.36-2.2]  | 0.80<br>[0.46-1.41] | 0.69<br>[0.25-1.87] | 1.05<br>[0.69-1.61]  | 1.60<br>[0.85-3.02]   | 1.46<br>[0.62-3.46]  |
| Exposure to IPV              | 1.18<br>[0.57-2.44]    | 1.05<br>[0.68-1.64] | 0.83<br>[0.47-1.49] | 1.6<br>[0.77-3.3]   | 1.18<br>[0.79-1.79]   | 0.81<br>[0.51-1.3]     | 0.79<br>[0.53-1.18]  | 0.95<br>[0.64-1.42] | 1.42<br>[0.89-2.25]  | 1.26<br>[0.64-2.49] | 0.92<br>[0.47-1.83] | 1.43<br>[0.86-2.37] | 0.94<br>[0.37-2.4]  | 0.86<br>[0.51-1.45]  | 2.16**<br>[1.31-3.55] | 2.02<br>[0.81-5.06]  |
| Household substance abuse    | 1.28<br>[0.68-2.42]    | 1.21<br>[0.81-1.82] | 1.71<br>[0.97-3.02] | 0.78<br>[0.41-1.5]  | 1.00<br>[0.68-1.47]   | 1.01<br>[0.65-1.58]    | 1.12<br>[0.77-1.64]  | 0.99<br>[0.67-1.45] | 0.79<br>[0.5-1.26]   | 0.88<br>[0.54-1.43] | 0.62<br>[0.31-1.25] | 1.00<br>[0.61-1.63] | 0.89<br>[0.38-2.12] | 1.05<br>[0.72-1.54]  | 0.85<br>[0.55-1.32]   | 0.83<br>[0.38-1.79]  |
| Chronic unemployment         | 0.52<br>[0.21-1.26]    | 0.98<br>[0.54-1.77] | 0.88<br>[0.36-2.13] | 2.37<br>[0.7-8.07]  | 0.89<br>[0.46-1.7]    | 1.87<br>[0.81-4.32]    | 0.78<br>[0.41-1.49]  | 1.49<br>[0.89-2.52] | 1.01<br>[0.55-1.86]  | 0.6<br>[0.29-1.25]  | 0.75<br>[0.3-1.91]  | 0.56<br>[0.27-1.16] | 1.26<br>[0.39-4.02] | 2.03*<br>[1.07-3.86] | 0.77<br>[0.38-1.59]   | 0.6<br>[0.22-1.61]   |
| Household legal trouble      | 1.72<br>[0.91-3.26]    | 1.15<br>[0.74-1.78] | 1.63<br>[0.94-2.83] | 1.39<br>[0.65-2.97] | 1.46<br>[0.96-2.21]   | 0.91<br>[0.56-1.47]    | 0.97<br>[0.67-1.41]  | 0.94<br>[0.65-1.37] | 1.15<br>[0.77-1.72]  | 0.94<br>[0.53-1.66] | 1.03<br>[0.56-1.91] | 1.03<br>[0.58-1.82] | 0.79<br>[0.27-2.28] | 0.81<br>[0.54-1.23]  | 1.46<br>[0.97-2.2]    | 1.21<br>[0.53-2.76]  |
| Household illness/disability | 1.46<br>[0.77-2.77]    | 0.89<br>[0.57-1.4]  | 0.91<br>[0.53-1.58] | 0.56<br>[0.27-1.15] | 1.68<br>[1.17-2.4]    | 1.33<br>[0.85-2.07]    | 1.34<br>[0.91-1.96]  | 0.87<br>[0.57-1.34] | 0.72<br>[0.48-1.08]  | 1.11<br>[0.61-2.04] | 1.49<br>[0.79-2.8]  | 1.02<br>[0.59-1.76] | 1.62<br>[0.68-3.87] | 1.24<br>[0.76-2.05]  | 1.26<br>[0.81-1.94]   | 0.99<br>[0.47-2.12]  |
| Household death              | 1.3<br>[0.68-2.46]     | 0.97<br>[0.64-1.47] | 0.93<br>[0.56-1.56] | 0.79<br>[0.41-1.51] | 1.12<br>[0.75-1.66]   | 0.67<br>[0.42-1.06]    | 1.55*<br>[1.03-2.33] | 1.65*<br>[1.09-2.5] | 1.31<br>[0.85-2.03]  | 1.39<br>[0.8-2.4]   | 1.14<br>[0.62-2.09] | 1.13<br>[0.67-1.89] | 0.96<br>[0.42-2.22] | 0.87<br>[0.56-1.36]  | 1.27<br>[0.82-1.96]   | 0.95<br>[0.39-2.34]  |
| <b>Cumulative ACEs</b>       |                        |                     |                     |                     |                       |                        |                      |                     |                      |                     |                     |                     |                     |                      |                       |                      |
| Less than 6                  | Ref                    | Ref                 | Ref                 | Ref                 | Ref                   | Ref                    | Ref                  | Ref                 | Ref                  | Ref                 | Ref                 | Ref                 | Ref                 | Ref                  | Ref                   | Ref                  |
| 6 or more                    | 1.97*<br>[1.11-3.48]   | 1.44<br>[0.98-2.11] | 1.26<br>[0.76-2.07] | 0.88<br>[0.46-1.67] | 1.74**<br>[1.2-2.53]  | 1.24<br>[0.8-1.91]     | 1.47*<br>[1.04-2.09] | 1.16<br>[0.8-1.69]  | 1.34<br>[0.91-1.98]  | 1.47<br>[0.79-2.71] | 1.43<br>[0.82-2.48] | 1.37<br>[0.81-2.32] | 0.94<br>[0.39-2.24] | 1.29<br>[0.92-1.82]  | 1.84**<br>[1.22-2.76] | 1.8<br>[0.93-3.49]   |
| 0                            | Ref                    | Ref                 | Ref                 | Ref                 | Ref                   | Ref                    | Ref                  | Ref                 | Ref                  | Ref                 | Ref                 | Ref                 | Ref                 | Ref                  | Ref                   | Ref                  |
| 1                            | N/A                    | 0.65<br>[0.11-3.83] | N/A                 | N/A                 | 0.39<br>[0.02-7.99]   | 0.59<br>[0.08-4.4]     | 0.11<br>[0.01-2.41]  | 0.8<br>[0.2-3.26]   | 1.03<br>[0.06-19.19] | N/A                 | N/A                 | N/A                 | N/A                 | 1.3<br>[0.08-22.15]  | 0.21<br>[0.01-5.1]    | N/A                  |
| 2                            | N/A                    | 0.88<br>[0.3-2.58]  | N/A                 | N/A                 | 0.66<br>[0.04-11.22]  | 0.57<br>[0.15-2.19]    | 0.34<br>[0.02-6.4]   | 0.51<br>[0.18-1.49] | 2.02<br>[0.12-33.19] | N/A                 | N/A                 | N/A                 | N/A                 | 1.06<br>[0.07-15.6]  | 0.87<br>[0.06-13.82]  | N/A                  |
| 3                            | N/A                    | 0.47<br>[0.18-1.18] | N/A                 | N/A                 | 0.39<br>[0.03-5.37]   | 0.75<br>[0.32-1.74]    | 0.15<br>[0.01-2.22]  | 1.04<br>[0.57-1.93] | 1.17<br>[0.09-16.16] | 0.54<br>[0.06-4.5]  | 0.82<br>[0.13-4.97] | 0.65<br>[.13-3.33]  | N/A                 | 1.48<br>[0.12-17.87] | 0.36<br>[0.03-4.89]   | 1.09<br>[0.16-7.48]  |
| 4+                           | N/A                    | N/A                 | N/A                 | N/A                 | 0.77<br>[0.06-9.67]   | N/A                    | 0.21<br>[0.02-2.89]  | N/A                 | 1.77<br>[0.14-21.9]  | N/A                 | N/A                 | N/A                 | N/A                 | 2.06<br>[0.17-24.36] | 0.67<br>[0.06-7.9]    | N/A                  |
| <b>LCA derived clusters</b>  |                        |                     |                     |                     |                       |                        |                      |                     |                      |                     |                     |                     |                     |                      |                       |                      |
| Class 2                      | 0.29<br>[0.08-1.05]    | 1.14<br>[0.52-2.47] | 1.24<br>[0.34-4.46] | 0.9<br>[0.27-3.04]  | 1.77<br>[0.67-4.65]   | 1.67<br>[0.76-3.69]    | 0.92<br>[0.39-2.16]  | 1.74<br>[0.91-3.36] | 0.86<br>[0.39-1.89]  | 1.16<br>[0.48-2.82] | 1.42<br>[0.37-5.41] | 0.79<br>[0.32-1.96] | N/A                 | 1.61<br>[0.85-3.02]  | 1.25<br>[0.47-3.32]   | 1.37<br>[0.31-6.04]  |
| Class 3                      | 0.74<br>[0.24-2.31]    | 1.53<br>[0.59-4]    | 1.16<br>[0.3-4.42]  | 1.77<br>[0.49-6.33] | 1.67<br>[0.61-4.59]   | 1.25<br>[0.48-3.26]    | 0.62<br>[0.26-1.5]   | 1.74<br>[0.82-3.7]  | 1.58<br>[0.72-3.46]  | 1.23<br>[0.42-3.55] | 1.13<br>[0.25-5.12] | 1.34<br>[0.52-3.48] | N/A                 | 1.4<br>[0.68-2.89]   | 2.07<br>[0.77-5.57]   | 2.98<br>[0.67-13.24] |
| Class 4                      | N/A                    | 1.64<br>[0.74-3.65] | 1.57<br>[0.45-5.46] | 0.81<br>[0.24-2.76] | 2.5<br>[0.98-6.42]    | 2.09<br>[0.87-5.02]    | 1.19<br>[0.51-2.8]   | 1.9<br>[0.97-3.74]  | 1.56<br>[0.74-3.31]  | 1.62<br>[0.58-4.52] | 1.59<br>[0.41-6.12] | 1.12<br>[0.45-2.78] | N/A                 | 2.11*<br>[1.1-4.05]  | 2.84<br>[1.1-7.34]*   | 2.21<br>[0.44-11.12] |

\* $p < .05$  \*\* $p < .01$  \*\*\* $p < .001$ ; N/A = omitted due to within cell sizes

The table shows the fold-increase in the odds (OR, odds ratio) of each adult human capital outcome (columns) for each level of ACEs measurement (rows). Models were run separately for each of the 3 ACE measurements and fully adjusted for all covariates, including sex, SES at birth, SES at age 12, SES at age 22, maternal age at birth and maternal and paternal schooling.

**Supplementary Table S8: Adjusted associations between single, cumulative and clustered retrospective ACEs and health and human capital outcomes, by sex**

|                              | Psychological distress |                        | Social isolation    |                       | Incomplete schooling |                     | Unemployed           |                      | Substance use        |                     | HIV infection       |                       | Welfare receipt     |                      | Criminality            |                      |
|------------------------------|------------------------|------------------------|---------------------|-----------------------|----------------------|---------------------|----------------------|----------------------|----------------------|---------------------|---------------------|-----------------------|---------------------|----------------------|------------------------|----------------------|
|                              | Male                   | Female                 | Male                | Female                | Male                 | Female              | Male                 | Female               | Male                 | Female              | Male                | Female                | Male                | Female               | Male                   | Female               |
| <b>Single ACEs</b>           |                        |                        |                     |                       |                      |                     |                      |                      |                      |                     |                     |                       |                     |                      |                        |                      |
| Physical abuse               | 1.39<br>[0.6-3.22]     | 1.19<br>[0.53-2.69]    | 0.96<br>[0.33-2.74] | 6.02**<br>[1.93-8.85] | 0.91<br>[0.45-1.85]  | 1.73<br>[0.66-4.52] | 0.98<br>[0.51-1.87]  | 1.27<br>[0.56-2.85]  | 1.74<br>[0.85-3.56]  | 1.4<br>[0.32-6.09]  | 1.26<br>[0.49-3.26] | 0.80<br>[0.26-2.44]   | 0.65<br>[0.12-3.4]  | 0.94<br>[0.42-2.11]  | 1.44<br>[0.71-2.91]    | 1.07<br>[0.21-5.49]  |
| Sexual abuse                 | 1.61<br>[0.35-7.39]    | 2.20<br>[0.97-5.01]    | 1.97<br>[0.43-8.98] | 1.59<br>[0.42-5.97]   | 1.6<br>[0.49-5.24]   | 0.91<br>[0.29-2.79] | 0.66<br>[0.2-2.21]   | 0.9<br>[0.36-2.24]   | 1.24<br>[0.38-4.09]  | 1.69 [0.59-4.82]    | 2.8<br>[0.27-29.35] | 3.32*<br>[1.01-10.91] | 1.48<br>[0.18-12]   | 0.93<br>[0.37-2.37]  | 1.82<br>[0.56-5.93]    | 3.25<br>[0.29-11.76] |
| Emotional abuse              | 1.88<br>[0.93-3.79]    | 2.15**<br>[1.39-3.32]  | 0.74<br>[0.4-1.36]  | 0.93<br>[0.44-1.96]   | 1.47<br>[0.94-2.3]   | 1.6*<br>[1.02-2.49] | 1.17<br>[0.8-1.73]   | 0.93<br>[0.62-1.39]  | 1.23<br>[0.77-1.95]  | 0.78<br>[0.44-1.39] | 1.33<br>[0.67-2.68] | 1.21<br>[0.68-2.15]   | 1.13<br>[0.59-2.16] | 1.09<br>[0.71-1.67]  | 1.38<br>[0.91-2.1]     | 1.46<br>[0.66-3.24]  |
| Parental divorce             | 0.83<br>[0.47-1.49]    | 0.79<br>[0.52-1.21]    | 0.52*<br>[0.28-1]   | 0.78<br>[0.38-1.6]    | 0.88<br>[0.57-1.36]  | 0.7<br>[0.45-1.1]   | 0.9<br>[0.6-1.35]    | 1.21<br>[0.76-1.92]  | 0.86<br>[0.54-1.36]  | 1.10<br>[0.63-1.93] | 0.84<br>[0.4-1.77]  | 0.87<br>[0.47-1.62]   | 1.02<br>[0.42-2.49] | 1.18<br>[0.77-1.81]  | 0.84<br>[0.52-1.36]    | 1.49<br>[0.6-3.68]   |
| Parental death               | 0.97<br>[0.5-1.88]     | 1.36<br>[0.84-2.20]    | 1.26<br>[0.68-2.31] | 1.54<br>[0.68-3.46]   | 1.1<br>[0.7-1.74]    | 1.26<br>[0.79-1.99] | 1.05<br>[0.69-1.59]  | 0.7<br>[0.45-1.11]   | 0.69<br>[0.45-1.06]  | 0.93<br>[0.45-1.94] | 1.21<br>[0.67-2.21] | 1.02<br>[0.59-1.77]   | 0.82<br>[0.32-2.09] | 0.78<br>[0.49-1.25]  | 1.03<br>[0.66-1.62]    | 2.21<br>[0.93-5.26]  |
| Exposure to violence         | 0.92<br>[0.49-1.72]    | 1.17<br>[0.72-1.92]    | 1.15<br>[0.64-2.06] | 1.51<br>[0.71-3.2]    | 0.92<br>[0.62-1.38]  | 1.02<br>[0.62-1.69] | 0.94<br>[0.63-1.42]  | 1.00<br>[0.67-1.49]  | 1.96**<br>[1.3-2.96] | 1.52<br>[0.85-2.75] | 0.90<br>[0.44-1.83] | 1.04<br>[0.57-1.89]   | 1.02<br>[0.45-2.33] | 0.86<br>[0.54-1.37]  | 1.58<br>[0.99-2.53]    | 1.11<br>[0.42-2.95]  |
| Exposure to IPV              | 0.91 [0.36-2.29]       | 1.10<br>[0.59-2.04]    | 0.74<br>[0.3-1.82]  | 0.24<br>[0.05-1.15]   | 1.03<br>[0.6-1.76]   | 0.78<br>[0.39-1.57] | 0.97<br>[0.56-1.66]  | 0.46*<br>[0.23-0.94] | 0.87<br>[0.46-1.62]  | 1.48<br>[0.64-3.43] | 0.77<br>[0.29-2.03] | 0.69<br>[0.32-1.49]   | 0.95<br>[0.22-4.1]  | 0.72<br>[0.4-1.31]   | 1.44<br>[0.77-2.68]    | 1.01<br>[0.3-3.36]   |
| Household substance abuse    | 2.08*<br>[1.09-3.99]   | 1.01<br>[0.62-1.63]    | 1.56<br>[0.86-2.84] | 1.87<br>[0.91-3.85]   | 1.17<br>[0.71-1.91]  | 0.9<br>[0.54-1.48]  | 1.8**<br>[1.21-2.66] | 1.38<br>[0.85-2.24]  | 1.31<br>[0.85-2.03]  | 0.82<br>[0.42-1.62] | 1.37<br>[0.72-2.6]  | 1.68<br>[0.98-2.87]   | 0.96<br>[0.43-2.18] | 0.9<br>[0.54-1.48]   | 1.25<br>[0.82-1.91]    | 0.72<br>[0.26-2.04]  |
| Chronic unemployment         | 1<br>[0.56-1.79]       | 1.27<br>[0.83-1.95]    | 1.7<br>[0.96-3.02]  | 0.87<br>[0.42-1.78]   | 0.85<br>[0.55-1.31]  | 1.05<br>[0.68-1.61] | 1.16<br>[0.75-1.77]  | 1.02<br>[0.71-1.47]  | 0.96<br>[0.64-1.43]  | 0.97<br>[0.58-1.64] | 0.65<br>[0.31-1.34] | 0.67<br>[0.37-1.2]    | 0.95<br>[0.42-2.13] | 1.47*<br>[1.02-2.11] | 1.38<br>[0.9-2.11]     | 1.08<br>[0.47-2.47]  |
| Household legal trouble      | 0.85<br>[0.42-1.7]     | 0.94<br>[0.57-1.56]    | 0.61<br>[0.3-1.24]  | 0.97<br>[0.39-2.41]   | 1.04<br>[0.68-1.59]  | 0.87<br>[0.52-1.46] | 0.9<br>[0.57-1.42]   | 0.96<br>[0.61-1.57]  | 0.98<br>[0.77-2.86]  | 1.49<br>[0.82-2.88] | 1.54<br>[0.44-1.76] | 0.88<br>[0.28-1.33]   | 0.61<br>[0.63-2.16] | 1.17<br>[0.71-1.68]  | 1.09<br>[0.71-1.68]    | 0.99<br>[0.41-2.41]  |
| Household illness/disability | 1.53<br>[0.77-3.04]    | 1.88**<br>[1.18-2.98]  | 0.74<br>[0.4-1.37]  | 1.07<br>[0.53-2.19]   | 0.97<br>[0.64-1.48]  | 0.88<br>[0.54-1.43] | 0.71<br>[0.46-1.1]   | 0.78<br>[0.54-1.11]  | 0.92<br>[0.59-1.45]  | 0.58<br>[0.34-1.00] | 0.88<br>[0.47-1.66] | 0.57*<br>[0.33-0.99]  | 1.07<br>[0.47-2.45] | 0.95<br>[0.63-1.44]  | 0.74<br>[0.44-1.25]    | 1.44<br>[0.58-3.55]  |
| Household death              | 0.83<br>[0.44-1.55]    | 0.91<br>[0.59-1.42]    | 1.01<br>[0.57-1.78] | 1.03<br>[0.54-1.99]   | 0.78<br>[0.47-1.3]   | 0.95<br>[0.61-1.48] | 1.25<br>[0.84-1.88]  | 1.18<br>[0.8-1.75]   | 1.06<br>[0.72-1.54]  | 0.84<br>[0.47-1.53] | 0.96<br>[0.43-2.14] | 0.69<br>[0.39-1.21]   | 0.89<br>[0.29-2.76] | 0.97<br>[0.61-1.53]  | 0.74<br>[0.45-1.22]    | 0.64<br>[0.27-1.49]  |
| <b>Cumulative ACEs</b>       |                        |                        |                     |                       |                      |                     |                      |                      |                      |                     |                     |                       |                     |                      |                        |                      |
| Less than 6                  | Ref<br>1.46            | Ref<br>2.04            | Ref<br>0.7          | Ref<br>1.26           | Ref<br>1.27          | Ref<br>1.15         | Ref<br>1.43          | Ref<br>0.85          | Ref<br>1.34          | Ref<br>1.02         | Ref<br>1.09         | Ref<br>0.66           | Ref<br>0.54         | Ref<br>1.03          | Ref<br>1.47            | Ref<br>2.77*         |
| 6 ore more                   | [0.76-2.82]            | [1.17-3.58]            | [0.29-1.7]          | [0.51-3.08]           | [0.79-2.03]          | [0.62-2.14]         | [0.84-2.42]          | [0.5-1.45]           | [0.8-2.24]           | [0.48-2.18]         | [0.48-2.46]         | [0.3-1.46]            | [0.16-1.86]         | [0.54-1.98]          | [0.87-2.48]            | [1.18-6.5]           |
| 0                            | Ref<br>1.2             | Ref<br>2.60            | Ref<br>0.66         | Ref<br>2.67           | Ref<br>0.74          | Ref<br>0.79         | Ref<br>0.87          | Ref<br>1.75          | Ref<br>0.97          | Ref<br>0.84         | Ref<br>0.7          | Ref<br>1.25           | Ref<br>1.44         | Ref<br>1.09          | Ref<br>2.31            | Ref<br>0.74          |
| 1                            | [0.3-4.88]             | [0.93-7.31]            | [0.25-1.77]         | [0.44-16.12]          | [0.35-1.57]          | [0.35-1.74]         | [0.39-1.91]          | [0.91-3.39]          | [0.45-2.09]          | [0.35-2]            | [0.2-2.47]          | [0.44-3.53]           | [0.32-6.52]         | [0.51-2.34]          | [0.8-6.73]             | [0.2-2.74]           |
| 2                            | 1.39<br>[0.31-6.18]    | 2.06<br>[0.73-5.82]    | 0.91<br>[0.34-2.43] | 1.85<br>[0.31-10.91]  | 1.04<br>[0.49-2.2]   | 1.27<br>[0.6-2.68]  | 1.05<br>[0.47-2.35]  | 1.08<br>[0.57-2.07]  | 1.29<br>[0.62-2.68]  | 0.86<br>[0.36-2.05] | 0.9<br>[0.25-3.22]  | 1.36<br>[0.53-3.49]   | 1.25<br>[0.21-7.52] | 1.44<br>[0.72-2.87]  | 3.10*<br>[1.05-9.14]   | 0.42<br>[0.1-1.8]    |
| 3                            | 2.07<br>[0.56-7.66]    | 3.43*<br>[1.13-7.38]   | 0.91<br>[0.35-2.4]  | 3.76<br>[0.59-23.96]  | 0.67<br>[0.31-1.45]  | 1.34<br>[0.62-2.89] | 1.18<br>[0.56-2.49]  | 0.85<br>[0.42-1.71]  | 1.96<br>[0.89-4.31]  | 1.05<br>[0.44-2.51] | 0.7<br>[0.19-2.57]  | 0.88<br>[0.28-2.74]   | 1.42<br>[0.24-8.3]  | 1.26<br>[0.62-2.55]  | 3.97**<br>[1.41-11.21] | 1.06<br>[0.29-3.91]  |
| 4+                           | 2.87<br>[0.8-10.29]    | 5.44***<br>[2.04-6.51] | 0.70<br>[0.28-1.73] | 2.92<br>[0.51-16.55]  | 0.95<br>[0.48-1.88]  | 0.9<br>[0.44-1.86]  | 1.17<br>[0.56-2.42]  | 1.01<br>[0.52-1.95]  | 1.59<br>[0.82-3.09]  | 1.04<br>[0.47-2.3]  | 1.05<br>[0.33-3.3]  | 1.02<br>[0.39-2.67]   | 1.14<br>[0.18-7.32] | 1.24<br>[0.59-2.58]  | 3.64**<br>[1.27-10.47] | 1.18<br>[0.36-3.82]  |
| <b>Clustered ACEs</b>        |                        |                        |                     |                       |                      |                     |                      |                      |                      |                     |                     |                       |                     |                      |                        |                      |
| Class 2                      | 1.45<br>[0.71-2.99]    | 1.55<br>[0.93-2.57]    | 1.26<br>[0.69-2.31] | 1.04<br>[0.46-2.34]   | 0.9<br>[0.56-1.46]   | 0.97<br>[0.61-1.53] | 1.11<br>[0.69-1.8]   | 1.00<br>[0.66-1.53]  | 0.93<br>[0.59-1.47]  | 1.33<br>[0.79-2.25] | 0.53<br>[0.22-1.25] | 0.65<br>[0.35-1.24]   | 1.09<br>[0.42-2.83] | 1.60*<br>[1.06-2.41] | 1.88*<br>[1.12-3.14]   | 0.69<br>[0.25-1.85]  |
| Class 3                      | 2.8*<br>[1.18-6.64]    | 2.71***<br>[1.58-4.63] | 0.6<br>[0.22-1.69]  | 1.63<br>[0.7-3.82]    | 1.17<br>[0.71-1.92]  | 0.91<br>[0.5-1.65]  | 0.97<br>[0.58-1.63]  | 0.7<br>[0.41-1.2]    | 1.16<br>[0.68-1.98]  | 1.48<br>[0.8-2.74]  | 1.13<br>[0.51-2.49] | 1.03<br>[0.55-1.95]   | 1.11<br>[0.36-3.41] | 0.95<br>[0.55-1.67]  | 2.12**<br>[1.2-3.74]   | 0.95<br>[0.37-2.43]  |
| Class 4                      | 2.50*<br>[1.16-5.37]   | 3.83***<br>[2.08-7.05] | 1.30<br>[0.61-2.77] | 0.69<br>[0.23-2.05]   | 1.02<br>[0.6-1.72]   | 1.01<br>[0.55-1.88] | 1.35<br>[0.74-2.47]  | 0.61<br>[0.33-1.13]  | 1.31<br>[0.78-2.2]   | 0.74<br>[0.24-2.31] | 1.01<br>[0.39-2.61] | 0.75<br>[0.37-1.5]    | 0.75<br>[0.24-2.33] | 1.30<br>[0.7-2.43]   | 2.01*<br>[1.07-3.79]   | 1.99<br>[0.8-4.97]   |

\* $p < .05$  \*\* $p < .01$  \*\*\* $p < .001$ ; N/A = omitted due to within cell sizes

The table shows the fold-increase in the odds (OR, odds ratio) of each adult human capital outcome (columns) for each level of ACEs measurement (rows). Models were run separately for each of the 3 ACE measurements and fully adjusted for all covariates, including sex, SES at birth, SES at age 12, SES at age 22, maternal age at birth and maternal and paternal schooling.
